# Supplementary material
Source: PubMed Central journal article supplement (PMC11595704)
Supplement: NIHMS2028699-supplement-supplementary_material.pdf [file NIHMS2028699-supplement-supplementary_material.pdf]

## Supplemental Material\*

Paules CI, Wang J, Tomashek KM, et al. A risk profile using simple hematologic parameters to assess benefits from baricitinib in patients hospitalized with COVID-19: a post hoc analysis of the Adaptive COVID-19 Treatment Trial-2. *Ann Intern Med.* 27 February 2024. [Epub ahead of print]. doi:10.7326/M23-2593

### Table of Contents

|                                                                                                                                                                               |    |
|-------------------------------------------------------------------------------------------------------------------------------------------------------------------------------|----|
| DISCLAIMER .....                                                                                                                                                              | 3  |
| Collaborating Investigators (ordered by enrollment) .....                                                                                                                     | 3  |
| Supplemental Methods.....                                                                                                                                                     | 6  |
| Supplemental Statistical Methods .....                                                                                                                                        | 6  |
| PATH guidelines for assessing heterogeneity of treatment effect.....                                                                                                          | 7  |
| PATH criteria: when is a risk-modeling approach to RCT analysis likely to be most valuable?.....                                                                              | 7  |
| PATH guidance on risk-modeling approaches to identify HTE .....                                                                                                               | 8  |
| Supplemental Laboratory Methods.....                                                                                                                                          | 9  |
| Statistical Analysis of Laboratory Parameters.....                                                                                                                            | 10 |
| Supplemental Tables and Figures .....                                                                                                                                         | 11 |
| Supplement Table 1. Definition of the 8-category ordinal scale of disease severity based on oxygen delivery method and clinical status.....                                   | 11 |
| Supplement Table 2: Hazard ratio coefficients for the ACTT-1 derived risk score for invasive mechanical ventilation (IMV) and/or death.....                                   | 11 |
| Supplement Table 3: Number of participants included in different analyses by treatment arm.....                                                                               | 12 |
| Supplement Table 4: Number and % of participants in the as-treated population missing values of variables analyzed at baseline .....                                          | 13 |
| Supplement Table 5: ACTT-2, Quartiles of ACTT risk profile vs. treatment assignment.....                                                                                      | 14 |
| Supplement Table 6: Baseline characteristics of ACTT-1 participants by quartiles of the ACTT risk profile .....                                                               | 15 |
| Supplement Figure 1: ACTT risk profile distribution by treatment arm and overall in ACTT-2.....                                                                               | 16 |
| Supplement Figure 2: Receiver Operating Characteristic (ROC) curves for death, IMV/death, and recovery for the ACTT risk profile.....                                         | 17 |
| Supplement Table 7: AUROC values with 95% confidence intervals for death, IMV/death, and recovery for the ACTT risk profile. ....                                             | 17 |
| Supplement Table 8: Hosmer Lemeshow calibration test statistics for the ACTT risk profile. ....                                                                               | 18 |
| Supplement Figure 3: Hazard ratios from Cox regression for the effect of baricitinib+remdesivir vs. placebo+remdesivir for risk groups defined by the ACTT risk profile. .... | 19 |
| Supplement Table 9: Baseline characteristics of ACTT-2 participants in high-risk group by treatment arm .....                                                                 | 20 |

|                                                                                                                                                                                                                                                   |    |
|---------------------------------------------------------------------------------------------------------------------------------------------------------------------------------------------------------------------------------------------------|----|
| Supplement Figure 4: Estimated difference in cumulative incidence of IMV/death, death, and recovery between baricitinib+remdesivir and placebo+remdesivir for risk groups defined by the ACTT risk profile. ....                                  | 22 |
| Supplement Figure 5: Hazard ratios from adjusted Fine-Gray competing risks models for the effect of baricitinib+remdesivir vs. placebo+remdesivir for risk groups defined by the ACTT risk profile.....                                           | 23 |
| Supplement Table 10: Coefficient estimates from a Fine-Gray competing risk model assessing the interaction between treatment group and ACTT risk profile quartile among ACTT-2 participants on time to recovery. ....                             | 24 |
| Supplement Table 11: Linear regression assessing the interaction effect between treatment group and ACTT risk profile quartile among ACTT- 2 participants on the difference in log(Absolute Lymphocyte Count) from baseline to Day 5. ....        | 25 |
| Supplement Figure 6. Fine-Gray subdistribution hazard ratios (HR) for the effect of baricitinib+remdesivir vs. placebo+remdesivir by risk quartiles defined by baseline C-reactive protein (CRP) levels instead of by the ACTT risk profile. .... | 26 |
| Supplement Figure 7. Fine-Gray subdistribution hazard ratios (HR) for the effect of baricitinib+remdesivir vs. placebo+remdesivir by baseline absolute neutrophil count (ANC) quartiles instead of by ACTT risk profile quartiles.....            | 27 |
| Supplement Figure 8. Fine-Gray subdistribution hazard ratios (HR) for the effect of baricitinib+remdesivir vs. placebo+remdesivir by baseline absolute neutrophil count (ANC) deciles.....                                                        | 28 |
| Supplement Figure 9. Fine-Gray subdistribution hazard ratios (HR) for the effect of baricitinib+remdesivir vs. placebo+remdesivir by absolute lymphocyte count (ALC) quartiles instead of ACTT risk profile quartiles .....                       | 29 |
| Supplement Figure 10. Fine-Gray subdistribution hazard ratios (HR) for the effect of baricitinib+remdesivir vs. placebo+remdesivir by baseline absolute lymphocyte count (ALC) deciles. ....                                                      | 30 |
| Supplement Table 12: Fractions and percentages of ACTT-2 participants receiving steroids prior to enrollment by ACTT risk profile quartile and treatment arm. ....                                                                                | 31 |
| Supplement Table 13: Fractions and percentages of ACTT-1 and ACTT-2 participants receiving steroids at any point during the study period by ACTT risk profile quartile and treatment arm. ....                                                    | 32 |
| Supplement Figure 11: Changes in log <sub>10</sub> viral load (upper panels) or C-reactive protein (CRP) (lower panels) after initiation of treatment with baricitinib+ remdesivir vs. placebo+remdesivir, by ACTT risk quartile. ....            | 33 |
| REFERENCES .....                                                                                                                                                                                                                                  | 34 |

\* This supplemental material was provided by the authors to give readers further details on their article. The material was not copyedited.

## DISCLAIMER

The contents of this publication are the responsibility of the authors and do not necessarily reflect the views, opinions, or policies of National Institutes of Health or the Department of Health and Human Services; the Henry M. Jackson Foundation for the Advancement of Military Medicine, Inc; the Department of Defense; the US Army Medical Department; the Uniformed Services University of the Health Sciences the US Army Office of the Surgeon General; the Departments of the Army, Navy, or Air Force; Brooke Army Medical Center; Walter Reed National Military Medical Center; Naval Medical Center San Diego; and Madigan Army Medical Center. Mention of trade names, commercial products, or organizations does not imply endorsement by the US Government.

The investigators have adhered to the policies for protection of human subjects as prescribed in 45 CFR 46

## Collaborating Investigators (ordered by enrollment)

### ACTT-2 STUDY GROUP

The ACTT-2 study group members were closely involved with the design, implementation, and oversight of the ACTT-2 study.

University of Texas Health San Antonio, University Health, and the South Texas Veterans Health Care System, San Antonio, TX. Thomas F. Patterson, M.D., Philip O. Ponce, M.D., Barbara S. Taylor, M.D., M.S., Jan E. Patterson, M.D., M.S., Jason E. Bowling, M.D., Heta Javeri, M.D.

University of Nebraska Medical Center, Omaha, NE. Andre C. Kalil, M.D., M.P.H., LuAnn Larson, BSN, Angela Hewlett, M.D., M.S.

Emory University, Atlanta, GA. Aneesh K. Mehta, M.D., Nadine G. Roupheal, M.D., Youssef Saklawi, M.D., Nicholas Scanlon, M.D., Jessica J. Traenkner, P.A.-C, Ronald P. Tribble Jr., M.D.,Ph.D.

Duke University, Durham, NC. Emmanuel B. Walter, M.D., M.P.H., Noel Ivey, M.D., Thomas L.Holland, M.D., M.Sc  
Instituto Nacional de Ciencias Médicas y Nutrición Salvador Zubiran, Mexico City, Mexico. Guillermo M. Ruiz-Palacios, M.D., Alfredo Ponce de León, M.D., Sandra Rajme, M.D.

University of California Irvine, Irvine, CA. Lanny Hsieh, M.D., Alpesh N. Amin, M.D., Miki Watanabe, MD, Helen S. Lee, Pharm.D., BCIDP.

University of Minnesota, Minneapolis, MN. Susan Kline, M.D., M.P.H., Joanne Billings, M.D.,M.P.H., Brooke Noren, R.N., Hyun Kim, MD, Tyler D. Bold, MD, PhD.

Cedars Sinai Medical Center, Los Angeles, CA. Victor Tapson, M.D., Jonathan Grein, M.D.,Fayyaz Sutterwala, M.D.

University of Florida Health-Shands Hospital, Gainesville, FL. Dr. Nicole Iovine, M.D., Lars K.Beattie, M.D., Rebecca Murray Wakeman, M.D., and Matthew Shaw, M.D.

UT Southwestern Medical Center, & Parkland Health & Hospital System, Dallas, TX. Mamta K.Jain, M.D., M.P.H., Satish Mocherla, M.D., Jessica Meisner, M.D., Amneris Luque, M.D.

University of California San Diego, La Jolla, CA. Daniel A. Sweeney, M.D., Constance A.Benson, M.D., Farhana Ali, M.D.

Baylor College of Medicine, Houston, TX. Robert L. Atmar, M.D., Hana M. El Sahly, M.D.,Jennifer Whitaker, M.D.

University of Rochester Medical Center, Rochester, NY. Ann R. Falsey, M.D., Angela R.Branche, M.D., Cheryl Rozario, M.D.

Instituto Nacional de Enfermedades Respiratorias, Mexico City, Mexico. Justino Regalado Pineda, M.D. M.Sc., José Arturo Martínez-Orozco M.D.

National Centre for Infectious Diseases/Tan Tock Seng Hospital, Singapore. David Chien Lye, MBBS, Sean WX Ong MBBS, Po Ying Chia, MBBS, Barnaby E Young, MBBS

Baylor Scott & White Health, Dallas, TX. Uriel Sandkovsky, M.D., M.S, Mezgebe Berhe, M.D.,M.P.H., Clinton Haley, M.D., M.P.H., Emma Dishner, M.D., M.P.H.

Grady Memorial Hospital, Atlanta, GA. Valeria D Cantos, M.D., Colleen F. Kelley, M.D., M.P.H., Paulina A. Rebolledo Esteinou M.D., M.Sc., Sheetal Kandiah, M.D., M.P.H.

University of California San Francisco, San Francisco, CA. Sarah B. Doernberg, M.D., Pierre-Cedric B. Crouch, Ph.D., R.N., ANP-BC, ACRN, Hannah Jang, Ph.D., R.N., CNL, PHN

Zuckerberg San Francisco General, San Francisco, CA. Anne F. Luetkemeyer, M.D., Jay Dwyer, RN.

University of California Davis, Davis, CA. Stuart H. Cohen M.D., George R. Thompson 3rd, M.D., Hien H. Nguyen, M.D., M.A.S.

University of Massachusetts Medical School, Worcester, MA. Robert W. Finberg, M.D., Jennifer P. Wang, M.D., Juan Perez-Velazquez, MD, Mireya Wessołosky, M.D.

University of Virginia, Charlottesville, VA. Patrick E. H. Jackson M.D., Taison D. Bell, M.D., Miranda J. West, M.S.

Northwestern University, Chicago, IL. Babafemi Taiwo, M.B.B.S., Karen Krueger M.D., Johnny Perez, RN, BSN., Triniece Pearson, PhD, MBA, RN, CCRC

Pennsylvania State Health Milton S. Hershey Medical Center, Hershey, PA. Catharine I. Paules, M.D., Kathleen G. Julian MD, Danish Ahmad MD, Alexander G. Hajduczuk MD

Providence Sacred Heart Medical Center, Spokane, WA. Henry Arguinchona M.D., Christa Arguinchona MSN, R.N., CCRN.

University of Alabama at Birmingham (UAB), Birmingham, AL. Nathaniel Erdmann M.D., Ph.D., Paul Goepfert M.D.

Stanford University, Stanford, CA. Neera Ahuja, M.D.

Denver Health and Hospital Authority, Denver, CO. Maria G. Frank, M.D, David Wyles, M.D., Heather Young, M.D.

Seoul National University Hospital, Seoul, Korea. Myoung-don Oh, M.D., Wan Beom Park, M.D., Chang Kyung Kang, M.D.

Atlanta VA Medical Center, Atlanta, GA. Vincent Marconi, M.D., Abeer Moanna, M.D., Sushma Cribbs M.D., Telisha Harrison, M.S.W.

Seoul National University Bundang Hospital, Seongnam, Korea. Eu Suk Kim, M.D., Jongtak Jung, M.D., Kyoung-Ho Song, M.D., Hong Bin Kim, M.D.

Changi General Hospital, Singapore. Seow Yen Tan, MBBS, Humaira Shafi, MBBS, Jaime MF Chien, MBBS, Raymond KC Fong, MBBS

Rigshospitalet, Dept. of Infectious Diseases (CHIP), Copenhagen, Denmark. Daniel D. Murray, Ph.D., Jens Lundgren, M.D.

Aalborg University Hospital, Dept. of Infectious Diseases, Denmark. Henrik Nielsen, M.D.

Nord Zealand University Hospital, Dept. of Infectious Diseases, Denmark. Tomas Jensen, M.D.

Montefiore Medical Center/Albert Einstein College of Medicine, Bronx, NY. Barry S. Zingman, M.D., Robert Grossberg, M.D., Paul F. Riska, M.D.

University of California Los Angeles, Los Angeles, CA. Otto O. Yang M.D., Jenny Ahn R.N., B.S.N., Rubi Arias B.A.

University of Maryland School of Medicine, Baltimore, MD. Rekha R. Rapaka, M.D. Ph.D., Naomi Hauser, M.D., James D. Campbell, M.D., M.S.

University of Pennsylvania, Philadelphia, PA. William R. Short, M.D. M.P.H., Pablo Tebas, M.D., Jillian T. Baron, M.D., M.P.H.

University of Texas Medical Branch, Galveston, TX. Susan L. F. McLellan MD, MPH, Lucas S. Blanton, MD, Justin B. Seashore MD

Vanderbilt University Medical Center, Nashville, TN. C. Buddy Creech, M.D., M.P.H., Todd W. Rice, M.D., MSCI; Shannon Walker, MD; Isaac P. Thomsen, MD, MSCI

Evergreen Health Medical Center, Kirkland, WA. Diego Lopez de Castilla, M.D. M.P.H., Jason W. Van Winkle M.D., Francis X. Riedo M.D.

Ng Teng Fong General Hospital, Singapore. Surinder Kaur Pada, M.D., MBBS, MPH, Alvin DY Wang, MBBS, Li Lin, MD

University of New Mexico Health Sciences Center, Albuquerque, NM. Michelle Harkins, M.D., Gregory Mertz MD,

Nestor Sosa MD

National University Hospital, Singapore. Louis Yi Ann Chai, MBBS, PhD, Paul Anantharaja Tambyah, MBBS, Sai Meng Tham, MBBS, Sophia Archuleta, M.D., Gabriel Yan, MBBS

Brooke Army Medical Center; and IDCRP, USUHS, San Antonio, TX. David A. Lindholm, M.D., Ana Elizabeth Markelz, M. D.

IDCRP, USUHS; HJF; and Brooke Army Medical Center, San Antonio, TX. Katrin Mende, Ph.D.

Kaiser Permanente Northwest, Portland, OR. Richard Mularski, M.D., M.S.H.S, M.C.R.

Massachusetts General Hospital, Boston, MA. Elizabeth Hohmann, M.D., Mariam Torres-Soto MA and Nikolaus Jilg M.D. Ph.D.

Naval Medical Center, San Diego; and IDCRP, USUHS, San Diego, CA. Ryan C. Maves, M.D.

IDCRP, USUHS; HJF; and Naval Medical Center San Diego, San Diego, CA. Gregory C. Utz, M.D.

Saint Louis University, Saint Louis, MO. Sarah L. George, M.D., Daniel F. Hoft, M.D., Ph.D., James D. Brien, Ph.D. Hospital Germans Trias i Pujol, Badalona, Spain. Roger Paredes, M.D., Ph.D., Lourdes Mateu, M.D., Ph.D., Cora Loste, M.D.

Georgetown University, Washington, DC. Princy Kumar, M.D., Sarah Thornton, MD, Sharmila Mohanraj, MD

Johns Hopkins University School of Medicine, Baltimore, MD. Noreen A. Hynes, M.D., M.P.H., Lauren M. Sauer, M.S.

Madigan Army Medical Center; and IDCRP, USUHS, Tacoma, WA. Christopher J. Colombo, M.D., M.A., Christina Schofield, M.D.

IDCRP, USUHS; HJF; and Madigan Army Medical Center, Tacoma, WA. Rhonda E. Colombo, M.D., M.H.S.

IDCRP, USUHS, Bethesda, MD; HJF, Bethesda, MD; and Madigan Army Medical Center, Tacoma WA.

Susan E Chambers, B.S.N., R.N.

University of Illinois at Chicago, Chicago, IL. Richard M. Novak, M.D., Andrea Wendrow RPh

Indiana University, Indianapolis, IN. Samir K. Gupta, M.D.

Naval Medical Center Portsmouth; and IDCRP, USUHS, Portsmouth, VA. Tida Lee, M.D., Ph.D.

IDCRP, USUHS; HJF; and Naval Medical Center Portsmouth, Portsmouth, VA. Tahaniyat Lalani, M.B.B.S., M.H.S.

VA Palo Alto Health Care System, Palo Alto, CA. Mark Holodniy, M.D., Aarthi Chary, M.D.

Walter Reed National Military Medical Center; and Infectious Disease Clinical Research Program (IDCRP),

Uniformed Services University of the Health Sciences (USUHS), Bethesda, MD. Nikhil Huprikar, M.D.

IDCRP, USUHS; Henry M. Jackson Foundation for the Advancement of Military Medicine, Inc. (HJF); and Walter Reed National Military Medical Center, Bethesda, MD. Anuradha Ganesan, M.B.B.S., M.P.H

National Center for Global Health and Medicine Hospital, Tokyo, Japan. Norio Ohmagari, M.D., Ph.D, Ayako Mikami, M.D., Ph.D.

Royal Victoria Infirmary, Newcastle, United Kingdom. D. Ashley Price, MRCP; Christopher J.A. Duncan, MRCP.

NYU Langone Health and NYC Health + Hospitals/ Bellevue, New York City, NY. Kerry Dierberg, M.D. M.P.H., Henry J Neumann, M.D.

Ochsner Medical Center Kenner, Kenner, LA. Stephanie N. Taylor, M.D., Alisha Lacour, M.D., Najy Masri, M.D.

Southeast Louisiana Veterans Health Care System, New Orleans, LA. Edwin Swiatlo, M.D., Kyle Widmer, M.D.

University of Minnesota, School of Public Health and INSIGHT, Minneapolis, MN. James D. Neaton, Ph.D.

Veterans Affairs Eastern Colorado Healthcare System, Aurora, CO. Mary Bessesen, M.D.

Infectious Diseases Clinical Research Consortium (IDCRC), Emory University, Atlanta, GA. David S. Stephens, M.D.

Infectious Disease Clinical Research Program, Uniformed Services University of the Health Sciences, Bethesda, MD. Timothy H. Burgess, M.D. M.P.H.

US Centers for Disease Control and Prevention Atlanta, GA. Timothy M Uyeki, M.D. M.P.H

Biomedical Advanced Research and Development Authority, Washington, DC. Robert Walker, M.D., G. Lynn Marks, M.D

Gilead Sciences, Foster City, CA. Anu Osinusi, M.D. M.P.H., Huyen Cao, M.D.

Eli Lilly, Indianapolis, IN. Anabela Cardoso, M.D., M.B.A., Stephanie de Bono, M.D. Ph.D.,

Douglas E Schlichting

Uniformed Services University of the Health Sciences, Bethesda, MD. Kevin K. Chung, M.D.  
The Emmes Company, LLC, Rockville, MD. Jennifer L. Ferreira, ScM; Michelle Green, MPH,  
MBA; Mat Makowski, PhD; Michael R. Wierzbicki, PhD; Tom M. Conrad, PhD; Jill Ann El-  
Khorazaty, MS; Heather Hill M.S.

Clinical Monitoring Research Program Directorate, Frederick National Laboratory for Cancer  
Research, Frederick, MD. Tyler Bonnett, M.S., Nikki Gettinger M.P.H, Theresa Engel, M.F.S.,  
Teri Lewis, B.S., Jing Wang M.S.

National Institute of Allergy and Infectious Diseases, National Institutes of Health, Bethesda,  
M.D. John H. Beigel, M.D., Kay M. Tomashek, M.D., M.P.H., Varduhi Ghazaryan, MD. MPH., Tatiana  
Beresnev, M.D. Seema Nayak, M.D., Lori E. Dodd, Ph.D., Walla Dempsey, Ph.D., Effie Nomicos R.N.,  
M.S.N., Marina Lee, Ph.D., Rhonda Pikaart-Tautges, Mohamed Elsayf M.D., Robert Jurao, R.N, B.S.N.,  
Hyung Koo, R.N., BSN, Michael Proschan, Ph.D., Tammy Yokum, M.S.N., R.N., Janice Arega, M.S., Ruth  
Florese, MPH, PhD., Jocelyn D. Voell, R.N., M.S., Richard Davey, M.D.

## Supplemental Methods

### Supplemental Statistical Methods

The analysis of the treatment effect of in the ACTT-2 trial of baricitinib+remdesivir compared to placebo+remdesivir focused on three clinical outcomes: 28-day recovery, 28-day mortality, and 28-day progression to invasive mechanical ventilation (IMV) or death. Each outcome was handled using a competing risks framework which recognizes that certain events necessarily preclude others (e.g., recovery is necessarily unobservable for participants who die before achieving recovery). It has been widely reported that failure to account for the presence of competing risks can lead to biased estimates of the relative hazard faced by different groups [1]. In the analysis of 28-day recovery, the competing event is death. In the analyses of 28-day mortality and 28-day progression to IMV or death, the competing event is recovery.

The competing risks coding is identical to the coding used for the originally published result [2]. In a traditional competing risks setting, the competing events are mutually exclusive. Note, however, that although it was rare in the ACTT studies it was possible to recover within 28 days of randomization and still go on to require IMV or die. This required the models for 28-day recovery and 28-day mortality to be fit separately, which is atypical of a competing risks analysis (in which, for example, the usual formulation would specify one Fine-Gray subdistribution hazards model for recovery and death from which the subdistribution hazard ratios for both competing events are estimated simultaneously). To handle the observed data for cases where both the primary event and competing event occurred, the primary event was given precedence. That is, participants who recovered and later died within 28 days were coded as having recovered in the 28-day recovery model but were coded as having died in the 28-day mortality model (there were N=2 cases where this occurred). For the 28-day progression to IMV or death outcome, where recovery is treated as a competing event, any recoveries which were observed prior to IMV or death were ignored (N=3).

The estimate of interest in the Fine-Gray subdistribution hazard model is a subdistribution hazard ratio (SHR) and is distinct from a hazard ratio estimated using a Cox model. The SHR relates the relative rates of the occurrence of the primary model event in subjects who have not yet experienced an event of that type (including those who have already experience the competing event). As such, the subdistribution hazard model estimates the effect of covariates on the cumulative incidence function for the primary event, which takes into account the presence of competing risks.

We implemented each of the above-described subdistribution hazard models 4 times using the ACTT-2 data: once for each quartile of the ACTT risk profile. Subdistribution hazard ratios for each quartile-outcome combination are presented in Figure 1. Note that there were no deaths observed in the “Least risk” quartile, leading to an undefined subdistribution hazard ratio for the 28-day mortality outcome.

## PATH guidelines for assessing heterogeneity of treatment effect

We followed the PATH guidelines for assessing heterogeneity of treatment effect [3, 4]. The recommendations are copied below.

The below two lists indicate PATH criteria for when risk modeling is likely to be valuable and for recommendations for risk modeling. The guidelines are in black, while blue text describes how they were satisfied for this paper. PATH guidelines for caveats before moving to clinical practices and for effect modeling as not applicable as we are not recommending a change in clinical practice and we performed risk modeling rather than effect modeling.

### *PATH criteria: when is a risk-modeling approach to RCT analysis likely to be most valuable?*

This list includes seven criteria. In general, not all criteria will be met for a single analysis. Criteria 1, 5, 6, 7 were met for this paper.

- 1) When an overall treatment effect is well established

The primary analysis showed that baricitinib + remdesivir improved time to recovery compared to remdesivir alone [5].

In the exploratory analysis of change in laboratory parameters from baseline to Day 5, we established overall effects for ANC, ALC, and CRP. These are the same parameters that differed significantly between treatment groups in the high-risk quartile.

- 2) When the benefits and harms/burdens of a given intervention are finely balanced (i.e., of similar magnitude on average), increasing the sensitivity of the treatment decision to risk prediction

The treatment was not associated with harm [5]

- 3) When treatments are associated with a nontrivial amount of serious harm or burden, increasing the importance of careful patient selection

The treatment was not associated with harm [5]

- 4) When several large, well-conducted RCTs of contemporary interventions are available and appropriate for pooling in individual patient meta-analysis, to provide improved statistical power and broader variation in baseline outcome risk

We analyzed a single trial.

- 5) When substantial, identifiable heterogeneity of risk in the trial population is anticipated

- a) When there are validated risk models and well-established risk factors

We used a risk profile developed and validated on the ACTT-1 data [2], and we also validated it on the ACTT-2 data. ACTT-2 participants showed heterogeneity by this risk profile.

- b) When case mix heterogeneity is substantial in the trial population
- 6) When there is strong preliminary evidence that a prediction model is clinically useful for treatment selection, or when models are in current use for treatment selection (i.e., validation is a high priority) In previous work, the risk profile identified a group of patients that benefitted the most from remdesivir treatment in ACTT-1 [2].
- 7) When the clinical variables in the proposed models are routinely available in clinical care The risk profile variables are routinely available (ALC, ANC, platelets, and oxygen support level).

### *PATH guidance on risk-modeling approaches to identify HTE*

#### **General**

1. Reporting RCT results stratified by a risk model is encouraged when overall trial results are positive to better understand the distribution of effects across the trial population.  
We reported results stratified on risk profile quartile.
2. Predictive approaches to HTE require close integration of clinical and statistical reasoning and expertise. The development of the original risk profile and its application in this work were both collaborative efforts by clinicians and statisticians.

#### **Identify or develop a model**

3. When available, apply a high-quality, externally developed, compatible risk model to stratify trial results.  
We applied a risk profile externally developed on the ACTT-1 data set to stratify the ACTT-2 data.
4. When a high-quality, externally developed model is unavailable, consider developing a model using the entire trial population to stratify trial results; avoid modeling on the control group only. N/A
5. When developing new risk models or updating externally developed risk models, specify the analytic plan before examining trial data and follow guidance for best practices for prediction model development. N/A

#### **Apply the model and report results**

6. Report metrics for model performance for outcome prediction on the RCT, including measures of discrimination and calibration (when appropriate).  
We reported ROC curves and AUROC for the risk profile in each ACTT-2 treatment group for three outcomes (recovery, mortality, and invasive mechanical ventilation and/or death) and included the Hosmer–Lemeshow C-statistics p-values to assess calibration.
7. Report distribution of predicted risk (or the risk score) in each group of the trial and in the overall study population.  
We included dot plots overlaid with violin plots of risk score distributions within each treatment group and overall.
8. Report outcome rates and both relative and absolute risk reduction across risk strata.  
The paper expanding and elaborating upon the PATH guideline states that this recommendation can also be met by reporting hazard ratios within a clinically meaningful window [4]. We opted for hazard ratios



instead of risk ratios as this was the prespecified analysis approach in the clinical trial [5] and was also used in the paper that developed the risk profile on the ACTT-1 data [2]. The PATH guidance for time-to-event analysis includes visualization of cumulative incidence curves, which we included for the high-risk cohort, and also states that “Relative treatment effect estimates can be summarized by hazard ratios over a clinically meaningful time horizon (or several such horizons). Absolute treatment effect estimates can be summarized by cumulative incidences at a clinically meaningful time point (or several such points).” [4] We summarized 28-day hazard ratios of outcomes (recovery, mortality, and invasive mechanical ventilation and/or death) and also included absolute treatment effect estimates quantified as differences in 28-day cumulative incidences of outcomes between treatment arms within each of the four risk quartiles.

9. When there are important treatment-related harms, these harms should be reported in each risk stratum to support stratum-specific evaluation of benefit–harm tradeoffs.

Important treatment-related harms were not found in ACTT-2. The primary analysis found that “patients receiving baricitinib plus remdesivir had a significantly lower incidence of adverse events, adverse events leading to discontinuation of the trial drug, serious adverse events, serious adverse events with a fatal outcome, and infection-related adverse events than patients who received remdesivir alone.” [5]

10. To test the consistency of the relative treatment effect across prognostic risk, a continuous measure of risk (e.g., the logit of risk) may be used in an interaction term with treatment group indicator.

For consistency with the previous analysis and with our primary analysis (which used risk quartiles), we included categorical risk quartile indicators in the model instead of a continuous risk profile variable. The high-risk quartile was omitted as the reference category. For time to recovery, we found a significant difference in treatment effect between high and least risk quartiles. For mortality and IMV/death, no significant differences were found.

## Supplemental Laboratory Methods

*C-reactive protein (CRP) measurement:* Frozen serum samples from participants were stored at -80 until use. All serum CRP measurements from individual participants was performed at National Laboratory for Cancer Research, Frederick, MD, USA for assay standardization. CRP levels were measured by an electrochemiluminescence assay (Meso Scale Discovery) per manufacturer protocol. Individual patient CRP measurements at a given timepoint were obtained in duplicate and averaged.

*Quantification of Upper respiratory SARS-CoV-2 RNA (Viral Load (VL):* Either oropharyngeal or nasopharyngeal swabs were collected from participants at baseline and study day 5 per trial protocol [2]. Swabs were preserved in viral transport media and at -70°C until analysis. Baseline and day 5 swabs from a subset of participants were analyzed. Swab viral loads were assayed by the Roche cobas SARS- CoV-2 RT-PCR assay on the Roche cobas 6800 system. Exogenous standards and calibrations were performed with the SeraCare AccuPlex SARS-CoV-2 verification panel. Measurement validations were performed with spike-in of clinical materials, as well as with use of reconstituted calibrators or standards. Quantitative calculations below the assay limit of quantification (LOQ) of 1.79 log<sub>10</sub> copies/mL, values were imputed to half the LOQ when RNA was detectable but below the LOQ (1.49 log<sub>10</sub> copies/mL or 31 copies/mL) and one quarter the LOQ (1.19 log<sub>10</sub> copies/mL or 15.5 copies/mL) when RNA was undetectable.

*Absolute lymphocyte count (ALC), Absolute neutrophil count (ANC), and Platelet count measurements:* Standard complete blood count collections were performed at each study site. ALC, ANC and Platelet count were determined within the participants hospital clinical lab and recorded at baseline prior to treatment, and at day 5 of study treatment.

## Statistical Analysis of Laboratory Parameters

As described in the main text, temporal trends of ACTT risk profile laboratory parameters (ALC, ANC, and Platelet count) were compared between treatment arms with t-tests on differences in the log-transformed values from baseline to study day 5. We performed linear regression of the change in log-transformed values from baseline to day 5 on treatment, risk quartile, and treatment- by- risk- quartile- interaction to evaluate differential treatment effects on ALC, ANC, and platelet count between ACTT risk quartiles. These analyses were repeated for CRP and VL. The log transformation was chosen because the distributions are skewed and because a multiplicative change was considered more clinically relevant than an additive change. For each laboratory parameter, participants with missing day-5 measurements were excluded from this analysis.

A separate analysis examined the baricitinib+remdesivir arm only. We compared ALC, ANC, and platelet trajectories between risk quartiles within the baricitinib+remdesivir arm alone with t-tests on the log-transformed ratio changes.

## Supplemental Tables and Figures

Supplement Table 1. Definition of the 8-category ordinal scale of disease severity based on oxygen delivery method and clinical status.

| Ordinal score (OS) value | Definition                                                                                                  |
|--------------------------|-------------------------------------------------------------------------------------------------------------|
| 1                        | Not hospitalized and no limitations of activities                                                           |
| 2                        | Not hospitalized, with limitation of activities, home oxygen requirement, or both                           |
| 3                        | Hospitalized, not requiring supplemental oxygen or ongoing medical care                                     |
| 4                        | Hospitalized, not requiring supplemental oxygen but requiring ongoing medical care                          |
| 5                        | Hospitalized, requiring any supplemental oxygen                                                             |
| 6                        | Hospitalized, requiring noninvasive ventilation or use of high-flow oxygen devices                          |
| 7                        | Hospitalized, receiving invasive mechanical ventilation (IMV) or extracorporeal membrane oxygenation (ECMO) |
| 8                        | Death                                                                                                       |

Recovery is defined as OS 1, 2, or 3.

Supplement Table 2: Hazard ratio coefficients for the ACTT-1 derived risk score for invasive mechanical ventilation (IMV) and/or death.

| Predictor variable                              | Hazard ratio | 95% confidence interval |
|-------------------------------------------------|--------------|-------------------------|
| Ordinal score (OS)                              | 0.91         | [0.71; 1.15]            |
| Log-transformed absolute neutrophil count (ANC) | 1.93         | [1.16; 3.20]            |
| Log-transformed platelet count                  | 0.63         | [0.38; 1.04]            |
| Log-transformed absolute lymphocyte count (ALC) | 0.58         | [0.40; 0.83]            |

The ACTT risk score is based on the following estimated linear predictor in the hazard function:  
 Linear predictor =  $\log(0.91) \times \text{OS} + \log(1.93) \times \log(\text{ANC}) + \log(0.63) \times \log(\text{platelets}) + \log(0.58) \times \log(\text{ALC})$ . The ACTT risk score quantifies the risk of IMV/death (so lies between zero and one) and was calculated by applying the predictRisk function in the riskRegression package to the competing risks model object. Coefficients were estimated in [2].

Supplement Table 3: Number of participants included in different analyses by treatment arm

|                                                               | Baricitinib +<br>Remdesivir | Placebo +<br>Remdesivir | Overall |
|---------------------------------------------------------------|-----------------------------|-------------------------|---------|
| Enrolled and randomized                                       | 515                         | 518                     | 1033    |
| As-treated population                                         | 508                         | 509                     | 1017    |
| Included in ACTT risk profile analysis                        | 494                         | 505                     | 999     |
| Included in analysis of change in ALC (Day 1 to 5)            | 404                         | 401                     | 805     |
| Included in analysis of change in ANC (Day 1 to 5)            | 404                         | 401                     | 805     |
| Included in analysis of change in platelet count (Day 1 to 5) | 404                         | 406                     | 810     |

Abbreviations: ALC (Absolute lymphocyte count), ANC (Absolute neutrophil count)

Supplement Table 3 shows numbers of participants included in various analyses. All analyses stratified by ACTT risk profile included 999 participants in the as-treated population who had non-missing risk profile components. These comprised 98% of the as-treated population. Supplement Table 4 summarizes number and % of participants in the as-treated population missing variables that we analyzed.

Supplement Table 4: Number and % of participants in the as-treated population missing values of variables analyzed at baseline

|                                       | Baricitinib + Remdesivir<br>n (%) | Placebo + Remdesivir<br>n (%) |
|---------------------------------------|-----------------------------------|-------------------------------|
| Age                                   | 0 (0)                             | 0 (0)                         |
| Sex                                   | 0 (0)                             | 0 (0)                         |
| Race group                            | 0 (0)                             | 0 (0)                         |
| Ethnicity                             | 0 (0)                             | 0 (0)                         |
| BMI (kg/m <sup>2</sup> )              | 13 (2.6)                          | 17 (3.3)                      |
| CRP (mg/L)                            | 21 (4.1)                          | 16 (3.1)                      |
| Viral Load (log <sub>10</sub> )       | 175 (34)                          | 174 (34)                      |
| Time from symptom onset to enrollment | 0 (0)                             | 2 (0.4)                       |
| Immunodeficiency (Yes)                | 0 (0)                             | 0 (0)                         |
| Baseline Ordinal Score                | 0 (0)                             | 0 (0)                         |
| Platelet count                        | 4 (0.8)                           | 1 (0.2)                       |
| Absolute Neutrophil Count             | 14 (2.8)                          | 3 (0.6)                       |
| Absolute Lymphocyte Count             | 13 (2.6)                          | 3 (0.6)                       |
| ACTT risk score                       | 14 (2.8)                          | 4 (0.8)                       |

Abbreviations BMI: Body mass index, CRP: C-reactive protein

Supplement Table 5: ACTT-2, Quartiles of ACTT risk profile vs. treatment assignment

|                                   | Assignment        |                   |                   |
|-----------------------------------|-------------------|-------------------|-------------------|
|                                   | Placebo +RDV      | Baricitinib + RDV | Total             |
| <b>ACTT risk profile quartile</b> |                   |                   |                   |
| Least risk                        | 139 (28%)         | 132 (27%)         | 271 (27%)         |
| Lower risk                        | 133 (26%)         | 103 (21%)         | 236 (24%)         |
| Moderate risk                     | 105 (21%)         | 116 (23%)         | 221 (22%)         |
| High risk                         | 128 (25%)         | 143 (29%)         | 271 (27%)         |
| <b>Total</b>                      | <b>505 (100%)</b> | <b>494 (100%)</b> | <b>999 (100%)</b> |

NOTE: Analysis includes 999 people who received the assigned treatment and had non-missing ACTT risk profile components (Supplement Table 3). RDV = Remdesivir

## Supplement Table 6: Baseline characteristics of ACTT-1 participants by quartiles of the ACTT risk profile

Risk quartiles were derived based on ACTT-1 and ACTT-2 participants combined. BMI: Body mass index; CRP: C-reactive protein; IQR: Interquartile range.

|                                                                                        | <b>Least risk<sup>a</sup></b><br><b>N = 242</b> | <b>Lower risk</b><br><b>N = 277</b> | <b>Moderate risk</b><br><b>N = 291</b> | <b>High risk</b><br><b>N = 241</b> | <b>Overall,</b><br><b>N = 1,051</b> |
|----------------------------------------------------------------------------------------|-------------------------------------------------|-------------------------------------|----------------------------------------|------------------------------------|-------------------------------------|
| <b>Age</b> - median [IQR]                                                              | 57 (45-65)                                      | 59 (48-69)                          | 60 (50-71)                             | 62 (52-71)                         | 59 (49-70)                          |
| <b>Sex</b> - Male – N (%)                                                              | 129(53)                                         | 172(62)                             | 197(68)                                | 180(75)                            | 678(65)                             |
| <b>Race group</b> - N (%)                                                              |                                                 |                                     |                                        |                                    |                                     |
| American Indian or Alaska Native                                                       | 0(0)                                            | 1(0.4)                              | 2(0.7)                                 | 4(1.7)                             | 7(0.7)                              |
| Asian                                                                                  | 25(10)                                          | 38(14)                              | 42(14)                                 | 30(12)                             | 135(13)                             |
| Black or African American                                                              | 50(21)                                          | 62(22)                              | 56(19)                                 | 51(21)                             | 219(21)                             |
| White                                                                                  | 145(60)                                         | 142(51)                             | 151(52)                                | 124(51)                            | 562(53)                             |
| <b>Ethnicity</b>                                                                       |                                                 |                                     |                                        |                                    |                                     |
| Hispanic or Latino - N (%)                                                             | 60(25)                                          | 60(22)                              | 65(22)                                 | 63(26)                             | 248(24)                             |
| <b>BMI</b> kg/m <sup>2</sup> - median (IQR)                                            | 29.6<br>(26.6-34.6)                             | 29.3<br>(25.7-33.3)                 | 29.4<br>(25.5-34.2)                    | 28.4<br>(24.7-33.7)                | 29.0<br>(25.6-34.0)                 |
| <b>Baseline CRP</b> mg/L – (mg/L) median [IQR]                                         | 79.2<br>(39.8-125.0)                            | 120.5<br>(74.8-180.2)               | 150.6<br>(89.1-228.1)                  | 171.3<br>(106.6-263.3)             | 126.6<br>(71.3-204.8)               |
| <b>Baseline Viral Load (log<sub>10</sub>),</b> - median (IQR)                          | 3.2<br>(2.3-4.2)                                | 3.3<br>(2.4-4.4)                    | 3.7<br>(2.9-4.7)                       | 3.6<br>(2.8-5.0)                   | 3.4<br>(2.5-4.6)                    |
| N (%) with viral load data (Collection was planned only for a subset of participants.) | 180(74)                                         | 207(75)                             | 202(69)                                | 176(73)                            | 765(73)                             |
| Time from symptom onset to enrollment (days) – median (IQR)                            | 9<br>(7-12)                                     | 9<br>(6-12)                         | 9<br>(7-12)                            | 9<br>(6-13)                        | 9<br>(6-12)                         |
| Immunodeficiency - N (%)                                                               | 13(5.4)                                         | 20(7.2)                             | 19(6.5)                                | 21(8.7)                            | 73(6.9)                             |

Supplement Figure 1: ACTT risk profile distribution by treatment arm and overall in ACTT-2

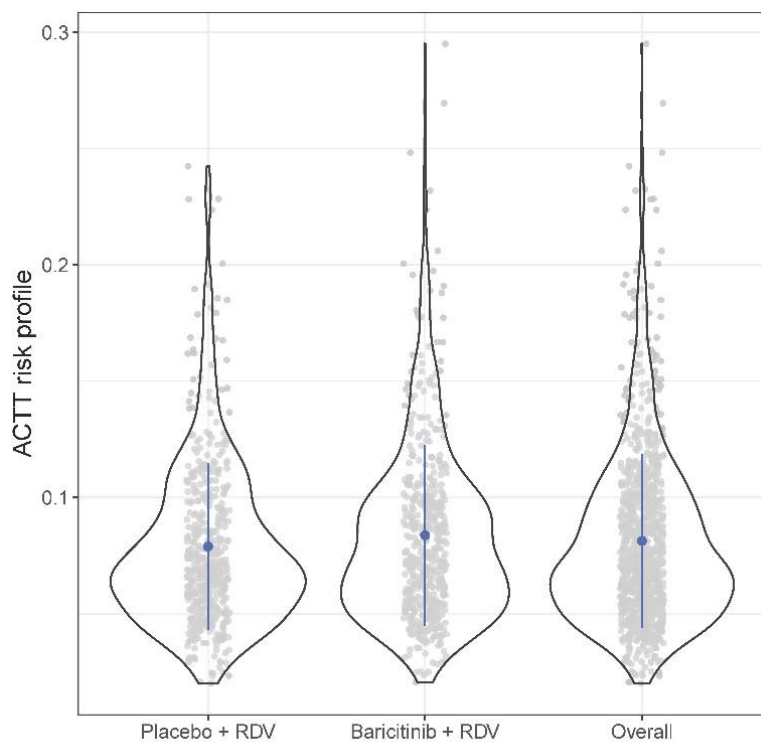

This figure shows the distribution of the predicted risk scores (ACTT risk profile) within each treatment arm and as a whole. The risk score for an individual is interpreted as the predicted risk of IMV/death. The mean for each treatment arm and the overall mean are denoted by blue dots, while blue bars indicate mean plus/minus one standard deviation. An extreme value with a risk profile of 0.989 in the placebo+RDV arm was excluded from the visualization. Because risk profile was analyzed by quartiles, this outlier does not exert undue influence. RDV=remdesivir



Supplement Figure 2: Receiver Operating Characteristic (ROC) curves for death, IMV/death, and recovery for the ACTT risk profile

ROC curves

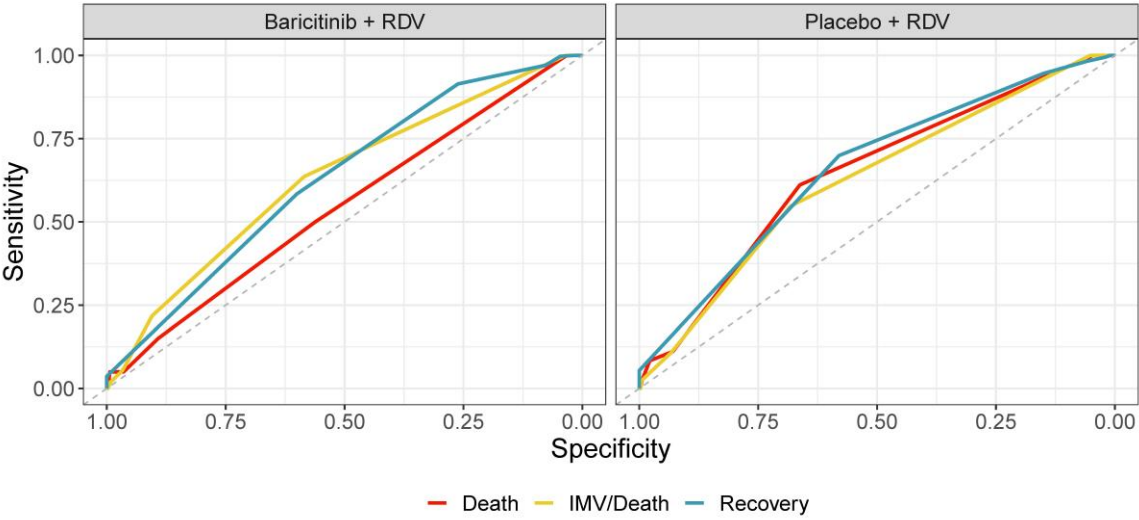

RDV= Remdesivir, IMV= Invasive Mechanical Ventilation

Supplement Table 7: AUROC values with 95% confidence intervals for death, IMV/death, and recovery for the ACTT risk profile.

| Treatment group | Death                        | IMV/Death                    | Recovery                     |
|-----------------|------------------------------|------------------------------|------------------------------|
| Baricitinib+RDV | 0.557<br>95%CI (0.439~0.675) | 0.664<br>95%CI (0.593~0.734) | 0.655<br>95%CI (0.583~0.726) |
| Placebo+ RDV    | 0.725<br>95%CI (0.657~0.792) | 0.674<br>95%CI (0.615~0.733) | 0.689<br>95%CI (0.632~0.746) |

RDV= Remdesivir, CI= Confidence Interval, IMV= Invasive Mechanical Ventilation, AUROC = Area Under the Receiver Operating Characteristics.

### Supplement Table 8: Hosmer Lemeshow calibration test statistics for the ACTT risk profile.

This table is included as part of PATH guidelines and shows chi-square test statistics and associated p-values derived from Hosmer-Lemeshow (H-L) tests, aiming to assess the calibration performance of prognostic models for each of the three endpoints by treatment arms. A large chi-square value indicates insufficient calibration. Smaller grouping numbers were used in H-L tests for “Death” to ensure that each group had at least 5 events (2 and 4 groups were selected for RDV (remdesivir) and Baricitinib+RDV model, respectively.) The default 10 groups were used for the other two endpoints. The results suggest that the ACTT risk profile is reasonably calibrated in the baricitinib + remdesivir arm for the endpoints of death and recovery, but not for IMV/death; also, is not sufficiently calibrated in the placebo + remdesivir arm for all the three endpoints.

| <b>Endpoint</b> | <b>Treatment arm</b> | <b>Test statistic</b> | <b>P-value</b> |
|-----------------|----------------------|-----------------------|----------------|
| IMV/death       | Placebo + RDV        | 83                    | <0.001         |
|                 | Baricitinib + RDV    | 16.9                  | 0.03           |
| Death           | Placebo + RDV        | 10.3                  | <0.001         |
|                 | Baricitinib + RDV    | 1.7                   | 0.42           |
| Recovery        | Placebo + RDV        | 20.2                  | 0.01           |
|                 | Baricitinib + RDV    | 5.4                   | 0.71           |

RDV= Remdesivir, IMV= Invasive Mechanical Ventilation

Supplement Figure 3: Hazard ratios from Cox regression for the effect of baricitinib+remdesivir vs. placebo+remdesivir for risk groups defined by the ACTT risk profile.

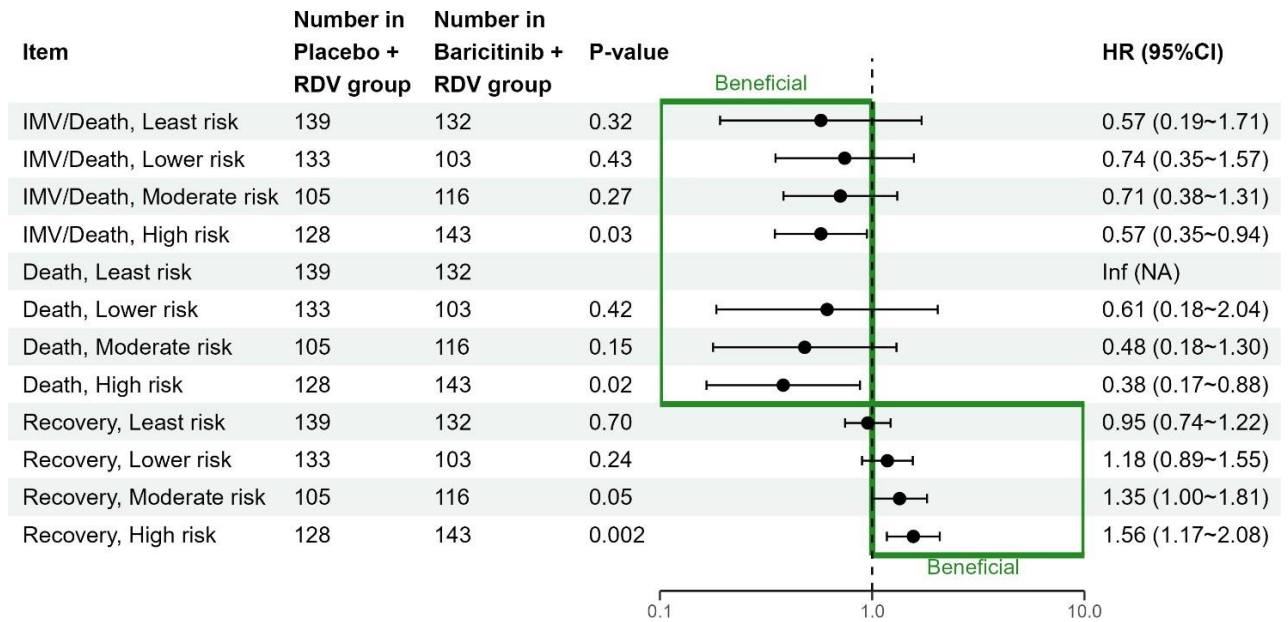

RDV=Remdesivir, CI=confidence interval, HR= Hazard Ratio, IMV= Invasive Mechanical Ventilation

Supplement Table 9 shows that baseline covariates are generally balanced between arms in the high-risk quartile, while [5] shows that they were balanced overall between treatment arms. Supplement Figure 4 summarizes treatment effect estimates from Fine-Gray competing risks models incorporating the following covariates: treatment assignment, age, sex, log transformed C-reactive protein, baseline ordinal score (categorized into levels 4,5,6, and 7), and the presence of coexisting conditions (none, one, and two or more). The adjusted analysis supports the primary finding of benefit on all three outcomes in the high-risk quartile.

### Supplement Table 9: Baseline characteristics of ACTT-2 participants in high-risk group by treatment arm

|                                                                                               | <b>Overall,<br/>N=271</b> | <b>Baricitinib +<br/>RDV,<br/>N=143</b> | <b>Placebo +<br/>RDV,<br/>N=128</b> |
|-----------------------------------------------------------------------------------------------|---------------------------|-----------------------------------------|-------------------------------------|
| <b>Age</b> - median (IQR)                                                                     | 59.0<br>(47.0-69.0)       | 59.0<br>(45.0-67.5)                     | 59.0<br>(49.0-69.3)                 |
| <b>Sex</b> - Male – N (%)                                                                     | 193(71)                   | 94(66)                                  | 99(77)                              |
| <b>Race group</b> - N (%)                                                                     |                           |                                         |                                     |
| American Indian or Alaska Native                                                              | 1(0.4)                    | 0(0)                                    | 1(0.8)                              |
| Asian                                                                                         | 26(9.6)                   | 15(10)                                  | 11(8.6)                             |
| Black or African American                                                                     | 32(12)                    | 17(12)                                  | 15(12)                              |
| White                                                                                         | 132(49)                   | 66(46)                                  | 66(52)                              |
| <b>Ethnicity</b>                                                                              |                           |                                         |                                     |
| Hispanic or Latino - N (%)                                                                    | 156(58)                   | 87(61)                                  | 69(54)                              |
| <b>BMI</b> (kg/m <sup>2</sup> ) - median (IQR)                                                | 29.4<br>(25.6-33.8)       | 30.0<br>(25.9-34.0)                     | 28.4<br>(25.5-33.6)                 |
| <b>Baseline CRP</b> (mg/L)- median (IQR)                                                      | 174.2 (108.4-<br>245.3)   | 175.0 (115.8-<br>238.1)                 | 173.3 (99.4-<br>259.5)              |
| <b>Baseline VL (log10)</b> - median (IQR)                                                     | 4.5 (2.9-5.8)             | 4.8 (1.7-6.2)                           | 4.4 (3.1-5.6)                       |
| <b>N (%) with viral load data</b> (Collection was planned only for a subset of participants.) | 171(63)                   | 87(61)                                  | 84(66)                              |
| <b>Time from symptom onset to enrollment</b> (days) – median (IQR)                            | 8.0 (5.0-10.0)            | 8.0 (6.0-10.0)                          | 8.0 (5.0-10.0)                      |
| <b>Baseline Absolute Lymphocyte Count (ALC)</b> (10 <sup>9</sup> /L) - median (IQR)           | 0.7 (0.5-0.9)             | 0.7 (0.5-0.9)                           | 0.7 (0.5-0.8)                       |
| <b>Baseline Absolute Neutrophil Count (ANC)</b> (10 <sup>9</sup> /L) - median (IQR)           | 7.8 (5.8-11.0)            | 8.2 (5.9-11.3)                          | 7.6 (5.8-10.4)                      |
| <b>Baseline Platelet count</b> (10 <sup>9</sup> /L) – median (IQR)                            | 207.0 (158.5-<br>256.5)   | 211.0 (168.5-<br>264.0)                 | 200.0 (151.0-<br>250.0)             |
| <b>Baseline Ordinal Score</b> - N (%)                                                         |                           |                                         |                                     |
| 4. Hospitalized, not requiring supplemental oxygen, requiring ongoing medical care            | 24(8.9)                   | 12(8.4)                                 | 12(9.4)                             |
| 5. Hospitalized, requiring supplemental oxygen                                                | 138(51)                   | 79(55)                                  | 59(46)                              |
| 6. Hospitalized, receiving noninvasive ventilation or high flow oxygen devices                | 65(24)                    | 34(24)                                  | 31(24)                              |
| 7. Hospitalized, receiving IMV or ECMO                                                        | 44(16)                    | 18(13)                                  | 26(20)                              |
| <b>Coexisting conditions</b> – N/total no. (%)                                                |                           |                                         |                                     |
| None                                                                                          | 50(18)                    | 23(16)                                  | 27(21)                              |
| One                                                                                           | 67(25)                    | 41(29)                                  | 26(20)                              |

|                                                       |               |               |               |
|-------------------------------------------------------|---------------|---------------|---------------|
| Two or more                                           | 146(54)       | 75(52)        | 71(55)        |
| <b>Immunodeficiency - N (%)</b>                       | 6(2.2)        | 3(2.1)        | 3(2.3)        |
| <b>Hypertension - N (%)</b>                           | 146(54)       | 75(52)        | 71(55)        |
| <b>Cancer - N (%)</b>                                 | 10(3.7)       | 4(2.8)        | 6(4.7)        |
| <b>Type I Diabetes - N (%)</b>                        | 1(0.4)        | 0(0)          | 1(0.8)        |
| <b>Type II Diabetes - N (%)</b>                       | 102(38)       | 61(43)        | 41(32)        |
| <b>Chronic kidney disease - N (%)</b>                 | 18(6.6)       | 6(4.2)        | 12(9.4)       |
| <b>Chronic liver disease - N (%)</b>                  | 9(3.3)        | 3(2.1)        | 6(4.7)        |
| <b>Chronic respiratory disease - N (%)</b>            | 19(7.0)       | 12(8.4)       | 7(5.5)        |
| <b>Asthma - N (%)</b>                                 | 23(8.5)       | 12(8.4)       | 11(8.6)       |
| <b>Coronary artery disease - N (%)</b>                | 35(13)        | 17(12)        | 18(14)        |
| <b>Congestive heart failure - N (%)</b>               | 18(6.6)       | 8(5.6)        | 10(7.8)       |
| <b>Chronic oxygen requirement - N (%)</b>             | 8(3.0)        | 5(3.5)        | 3(2.3)        |
| <b>Obesity - N (%)</b>                                | 127(47)       | 73(51)        | 54(42)        |
| <b>Cardiac valvular disease - N (%)</b>               | 11(4.1)       | 3(2.1)        | 8(6.3)        |
| <b>Coagulopathy - N (%)</b>                           | 2(0.7)        | 0(0)          | 2(1.6)        |
| <b>Current or prior DVT or PE - N (%)</b>             | 6(2.2)        | 1(0.7)        | 5(3.9)        |
| <b>Risk profile (continuous scale) – median (IQR)</b> | 0.7 (0.5-1.3) | 0.8 (0.5-1.4) | 0.7 (0.5-1.3) |

Supplement Table 9: All variables are balanced between the two treatment arms except for sex.

BMI: Body mass index; VL: Viral load, CRP: C-reactive protein IMV: Invasive Mechanical Ventilation; ECMO:

Extracorporeal membrane oxygenation, DVT: Deep Venous Thrombosis, PE: Pulmonary embolism, IQR: *Interquartile range*.

Supplement Figure 4: Estimated difference in cumulative incidence of IMV/death, death, and recovery between baricitinib+remdesivir and placebo+remdesivir for risk groups defined by the ACTT risk profile.

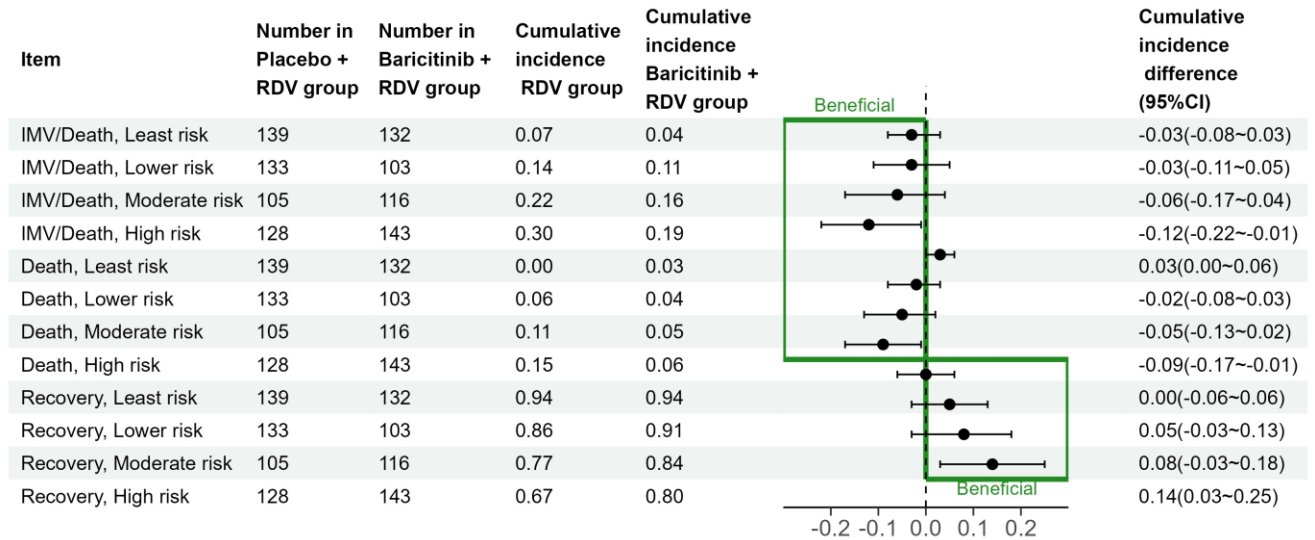

Supplement Figure 4 summarizes treatment effect estimates from Fine-Gray competing risks models incorporating the following covariates: treatment assignment, age, sex, log transformed C-reactive protein, baseline ordinal score (categorized into levels 4,5,6, and 7), and the presence of coexisting conditions (none, one, and two or more). The adjusted analysis supports the primary finding of benefit on all three outcomes in the high-risk quartile.

In the high-risk quartile, the 28-day cumulative incidence of invasive mechanical ventilation and/or death was 30% among placebo+remdesivir recipients and 19% among baricitinib+remdesivir recipients, a decrease of approximately 12 percentage points (cumulative incidence difference = -0.12). In the high-risk quartile, the 28-day cumulative incidence of death was 15% in placebo+remdesivir recipients and 6% among recipients of baricitinib+remdesivir, while that for recovery was 67% in placebo+remdesivir recipients and 80% in recipients of baricitinib+remdesivir. Abbreviations: RDV: remdesivir, IMV: Invasive mechanical ventilation

Supplement Figure 5: Hazard ratios from adjusted Fine-Gray competing risks models for the effect of baricitinib+remdesivir vs. placebo+remdesivir for risk groups defined by the ACTT risk profile.

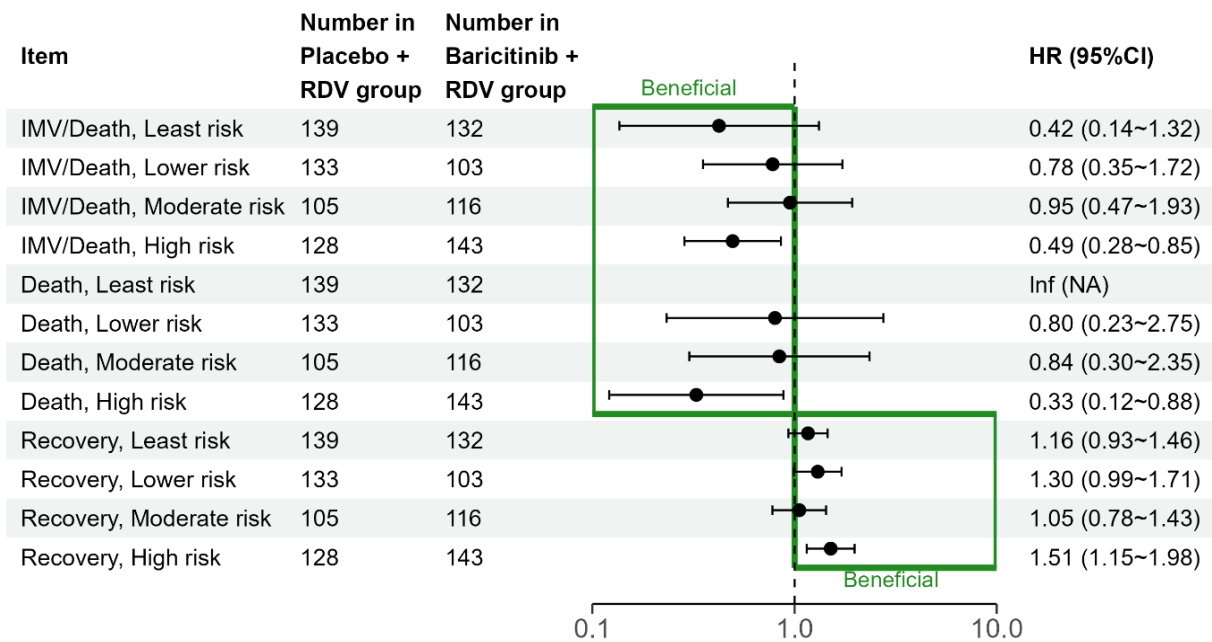

IMV: Invasive mechanical ventilation, RDV=Remdesivir, CI=confidence interval, HR= Hazard Ratio.

Supplement Table 10: Coefficient estimates from a Fine-Gray competing risk model assessing the interaction between treatment group and ACTT risk profile quartile among ACTT-2 participants on time to recovery.

Bari=baricitinib, RDV=remdesivir.

|                                         |                                 | Hazard Ratio | 95% Lower | 95% Upper | P-value |
|-----------------------------------------|---------------------------------|--------------|-----------|-----------|---------|
| <b>Time to Recovery</b>                 |                                 |              |           |           |         |
| Treatment (Bari+RDV vs. Placebo+RDV)    |                                 | 1.524        | 1.160     | 2.002     | 0.003   |
| Risk quartile indicators                | Moderate vs. High               | 1.271        | 0.954     | 1.695     | 0.10    |
|                                         | Lower vs. High                  | 1.847        | 1.408     | 2.424     | <0.001  |
|                                         | Least vs. High                  | 2.888        | 2.191     | 3.807     | <0.001  |
| Treatment by risk quartile interactions | (Moderate vs. High) × treatment | 0.854        | 0.582     | 1.252     | 0.42    |
|                                         | (Lower vs. High) × treatment    | 0.764        | 0.526     | 1.110     | 0.16    |
|                                         | (Least vs. High) × treatment    | 0.625        | 0.431     | 0.907     | 0.01    |
| <b>Time to IMV/death</b>                |                                 |              |           |           |         |
| Treatment (Bari+RDV vs. Placebo+RDV)    |                                 | 0.569        | 0.348     | 0.929     | 0.02    |
| Risk quartile indicators                | Moderate vs. High               | 0.685        | 0.413     | 1.136     | 0.14    |
|                                         | Lower vs. High                  | 0.414        | 0.238     | 0.721     | 0.002   |
|                                         | Least vs. High                  | 0.192        | 0.093     | 0.397     | <0.001  |
| Treatment by risk quartile interactions | (Moderate vs. High) × treatment | 1.240        | 0.566     | 2.715     | 0.59    |
|                                         | (Lower vs. High) × treatment    | 1.337        | 0.550     | 3.251     | 0.52    |
|                                         | (Least vs. High) × treatment    | 1.006        | 0.303     | 3.338     | 0.99    |
| <b>Time to Death*</b>                   |                                 |              |           |           |         |
| Treatment (Bari+RDV vs. Placebo+RDV)    |                                 | 0.374        | 0.163     | 0.857     | 0.02    |
| Risk quartile indicators                | Moderate vs. High               | 0.692        | 0.328     | 1.460     | 0.33    |
|                                         | Lower vs. High                  | 0.396        | 0.173     | 0.905     | 0.03    |
| Treatment by risk interactions          | (Moderate vs. High) × treatment | 1.293        | 0.355     | 4.706     | 0.70    |
|                                         | (Lower vs. High) × treatment    | 1.700        | 0.396     | 7.296     | 0.48    |

Supplement Table 10 shows results from a Fine-Gray model including treatment effects, risk quartile indicator variables, and treatment by risk interaction terms. The high-risk quartile was used as the reference category, so the subdistribution hazard ratio (HR) of 1.524 represents the HR for the treatment effect within the high-risk quartile. The significant interaction coefficient of 0.625 means that the HR for the treatment effect in the least-risk quartile is 0.625 times that for the high-risk quartile. Equivalently, the treatment effect for the high-risk quartile is  $1/0.625 = 1.60$  times that for the least-risk quartile, with 95% CI from  $1/0.907$  to  $1/0.431$  (i.e., 1.10 to 2.32). Although a multiplicity adjustment was not planned for these exploratory analyses, the p-value of 0.01 for this interaction coefficient retains significance after a Bonferroni correction adjusting for the three interaction tests. Other interactions comparing treatment effects on recovery between moderate and high-risk groups, and between lower-risk and high-risk groups, were not significant, nor were any of the treatment by risk quartile interaction terms for the outcomes of IMV/death and death. The model for time to death excludes the least risk group because cell counts in this category were too low (0 and 4 in control and treated arms) to obtain an estimable HR when this group was included.



Supplement Table 11: Linear regression assessing the interaction effect between treatment group and ACTT risk profile quartile among ACTT- 2 participants on the difference in log(Absolute Lymphocyte Count) from baseline to Day 5.

|                                              |                                 | Coefficient | Standard Error | P-value |
|----------------------------------------------|---------------------------------|-------------|----------------|---------|
| Intercept                                    |                                 | 0.130       | 0.047          | 0.005   |
| Treatment (Bari+RDV vs. Placebo+RDV)         |                                 | 0.411       | 0.066          | <0.001  |
| Risk quartile indicators                     | Moderate vs. High               | 0.022       | 0.070          | 0.755   |
|                                              | Lower vs. High                  | -0.122      | 0.068          | 0.072   |
|                                              | Least vs. High                  | -0.0003     | 0.071          | 0.997   |
| Risk quartile by treatment interaction terms | (Moderate vs. High) × treatment | -0.287      | 0.098          | 0.003   |
|                                              | (Lower vs. High) × treatment    | -0.040      | 0.098          | 0.687   |
|                                              | (Least vs. High) × treatment    | -0.204      | 0.099          | 0.039   |

Supplement Table 11 shows results from a linear regression model of log-transformed ratio of Day 5 to baseline Absolute Lymphocyte Count (ALC) (i.e.,  $\log(\text{Day 5 ALC} / \text{Baseline ALC}) = \log(\text{Day 5 ALC}) - \log(\text{baseline ALC})$ ) on treatment, risk quartile, and treatment by risk quartile interaction. The high-risk quartile was used as the reference category, so the treatment effect of 0.411 means that in the high-risk quartile, baricitinib+remdesivir increased the geometric mean ALC ratio change by a factor of  $\exp(0.411) = 1.508$  compared to placebo+remdesivir. The significant interaction term for the moderate-risk quartile means that the increase in geometric mean ALC ratio change due to baricitinib in the moderate-risk quartile was  $\exp(-0.287)=0.75$  times that in the high-risk quartile (i.e., the treatment effect was  $1.508 \times 0.75 = 1.13$  in the moderate-risk quartile, which was significantly different from the effect of 1.508 in the high-risk quartile,  $p=0.003$ ). The significant interaction term for the least-risk quartile means that the increase in geometric mean ALC ratio change due to baricitinib in the least-risk quartile was  $\exp(-0.204)=0.815$  times that in the high-risk quartile. In other words, the treatment effect was  $1.508 \times 0.815 = 1.23$  in the least risk quartile, which was significantly different from the estimated effect of 1.508 in the high-risk quartile,  $p=0.039$ ).

Analogous models were fit for the log-transformed changes in ANC, platelets, CRP, and viral load, but the interaction terms were not significant in those models, so results are not displayed. Bari=baricitinib, RDV=remdesivir.

Supplement Figure 6. Fine-Gray subdistribution hazard ratios (HR) for the effect of baricitinib+remdesivir vs. placebo+remdesivir by risk quartiles defined by baseline C-reactive protein (CRP) levels instead of by the ACTT risk profile.

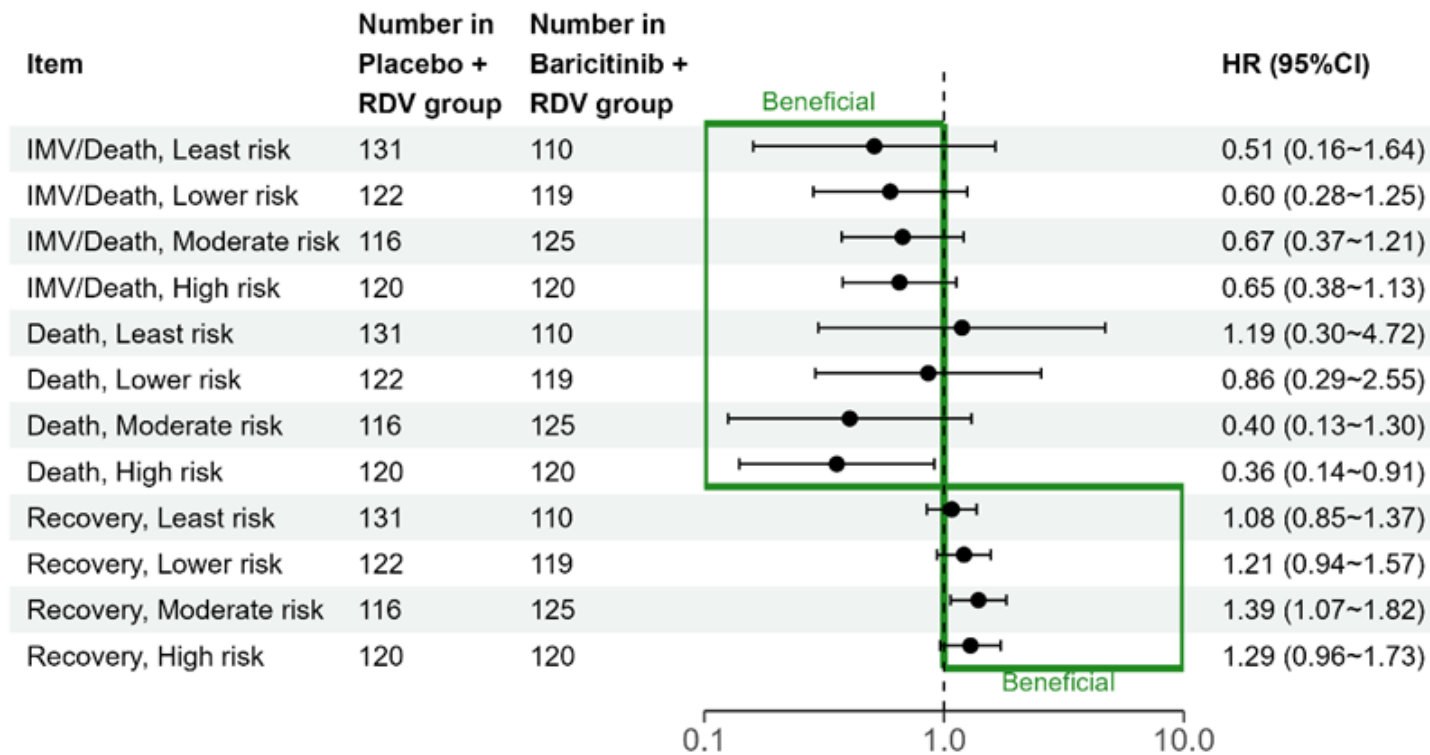

Supplement Figure 6 shows treatment effect estimates by CRP risk quartiles rather than ACTT risk profile quartiles. These show a similar pattern to Figure 1 in the main text. While the ACTT risk profile shows a significant treatment benefit on all three outcomes from baricitinib+remdesivir compared to placebo+remdesivir, CRP shows a significant benefit for mortality in the high-risk category, a significant benefit for recovery in the moderate-risk category, and no other significant treatment effects. RDV=remdesivir, CI=confidence interval, HR= Hazard Ratio.

Supplement Figure 7. Fine-Gray subdistribution hazard ratios (HR) for the effect of baricitinib+remdesivir vs. placebo+remdesivir by baseline absolute neutrophil count (ANC) quartiles instead of by ACTT risk profile quartiles.

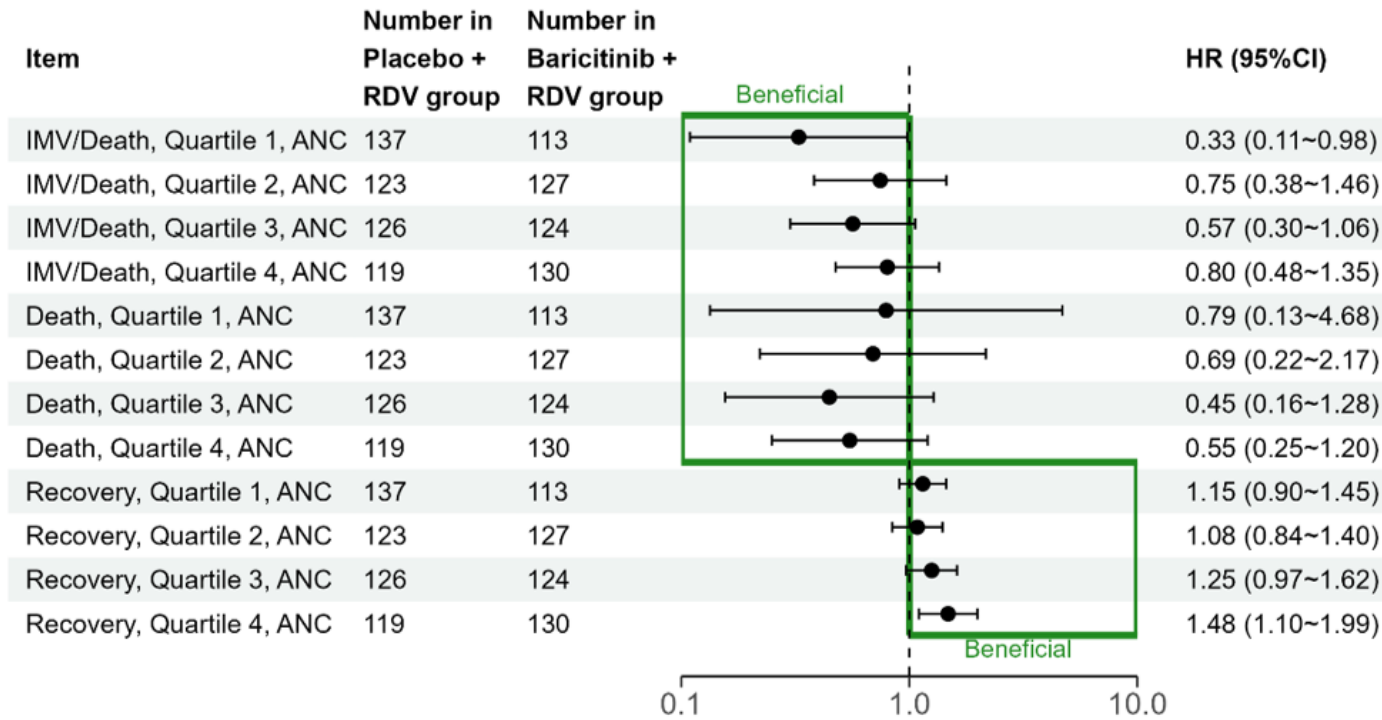

Supplement Figure 7 shows treatment effect estimates by ANC risk quartiles rather than ACTT risk profile quartiles. Baricitinib + remdesivir improved recovery time in the highest quartile of ANC, but did not experience a treatment effect for IMV/death or death alone.

RDV=remdesivir, CI=confidence interval, IMV: Invasive Mechanical Ventilation

Supplement Figure 8. Fine-Gray subdistribution hazard ratios (HR) for the effect of baricitinib+remdesivir vs. placebo+remdesivir by baseline absolute neutrophil count (ANC) deciles.

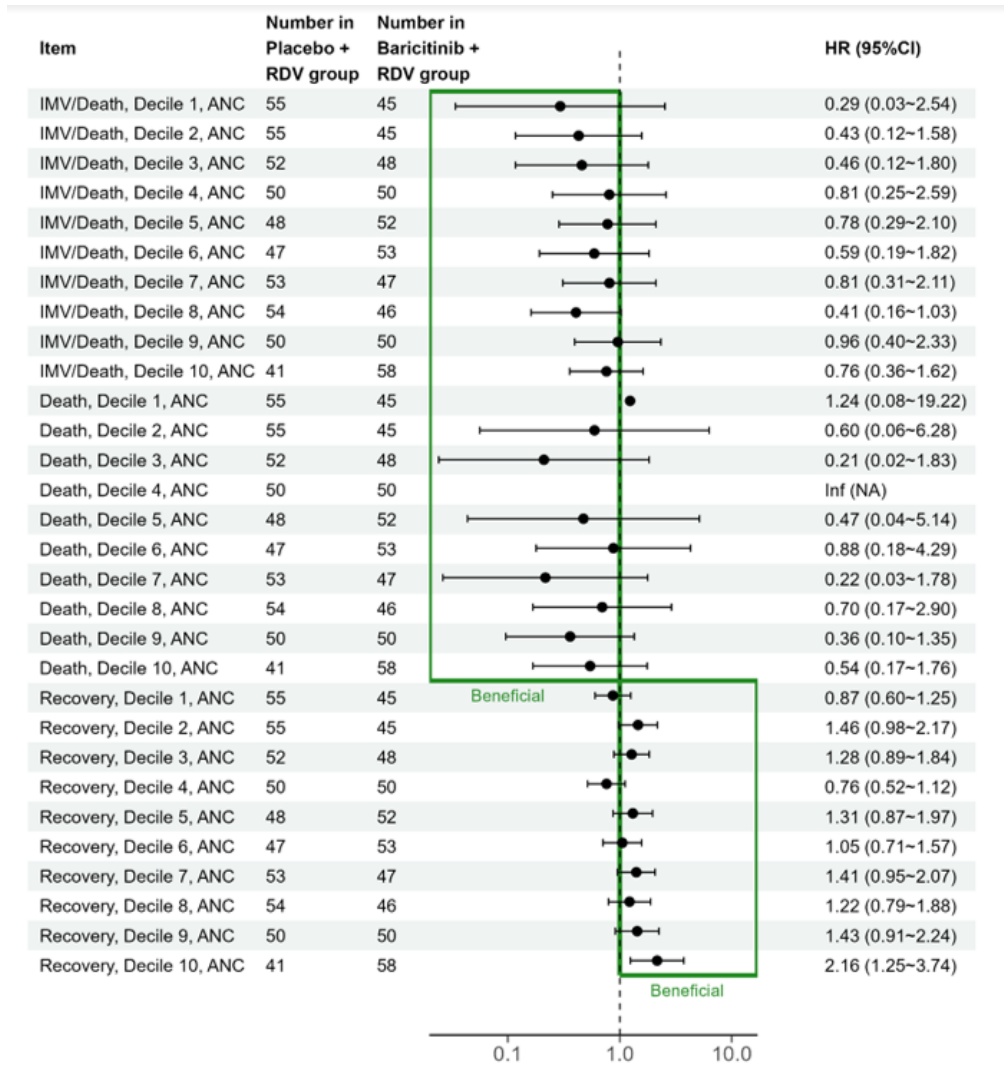

Supplement Figure 8 shows an analysis by ANC deciles, which also does not provide evidence for a threshold defining a subgroup that benefits most.

IMV: Invasive Mechanical Ventilation, RDV: remdesivir

Supplement Figure 9. Fine-Gray subdistribution hazard ratios (HR) for the effect of baricitinib+remdesivir vs. placebo+remdesivir by absolute lymphocyte count (ALC) quartiles instead of ACTT risk profile quartiles

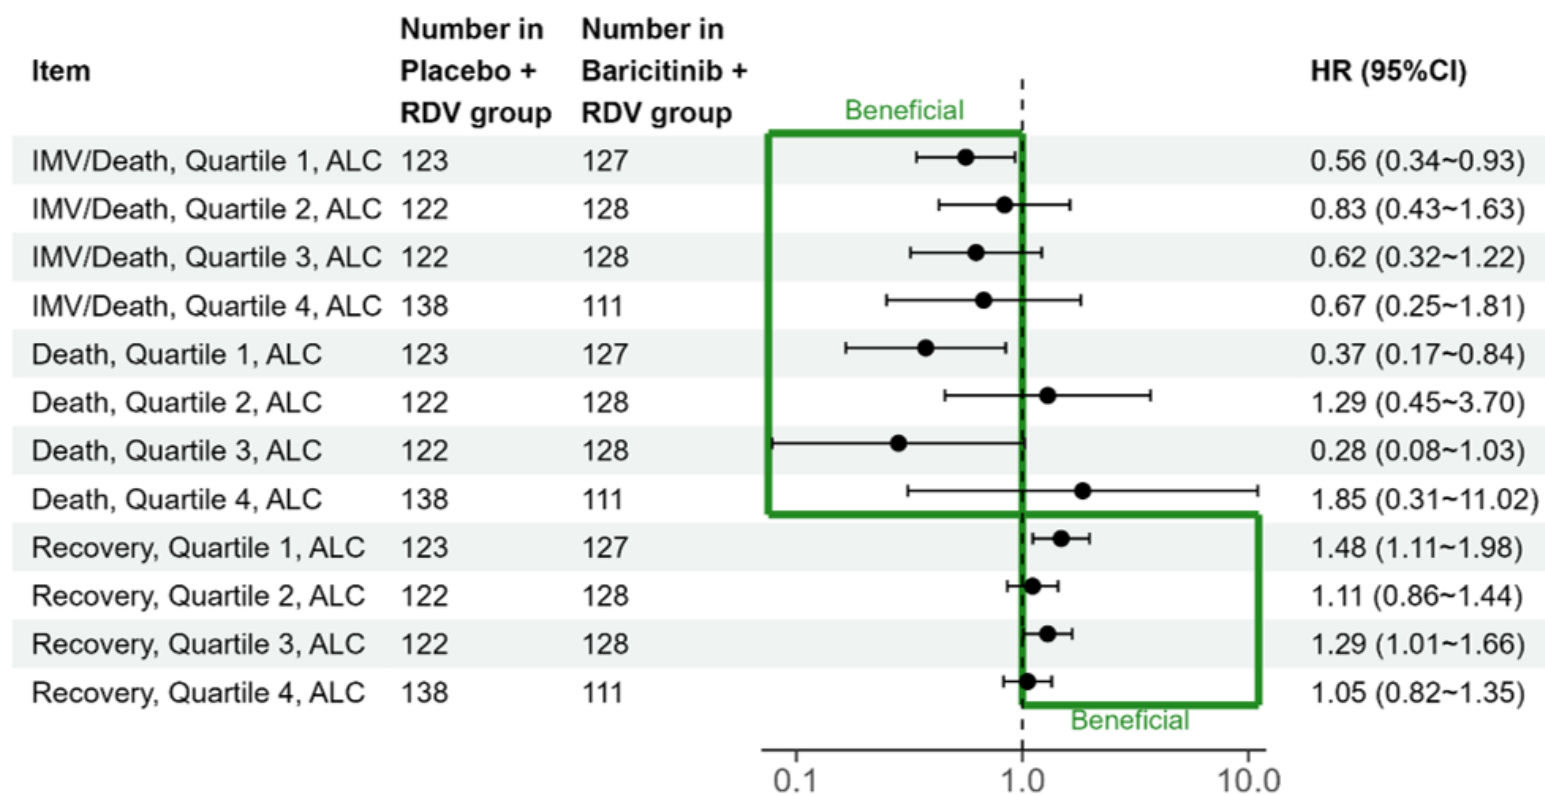

RDV=remdesivir, CI=confidence interval, HR= Hazard Ratio

Supplement Figure 9 shows treatment effect estimates by ALC risk quartiles rather than ACTT risk profile quartiles. The lowest ALC quartile (defined by ALC < 0.74 10<sup>9</sup>/L) benefits most from baricitinib+remdesivir for all outcomes analyzed, but the treatment effects in the other three quartiles do not show a pattern. The median ALC was 1.0, so a threshold of 1.0 would combine the first and second quartiles. Since treatment effects for the second quartile are much closer to the null value, combining these groups would dilute the treatment effect in the subgroup, so a threshold ALC of 1.0 would be less informative than 0.74.

Supplement Figure 10. Fine-Gray subdistribution hazard ratios (HR) for the effect of baricitinib+remdesivir vs. placebo+remdesivir by baseline absolute lymphocyte count (ALC) deciles.

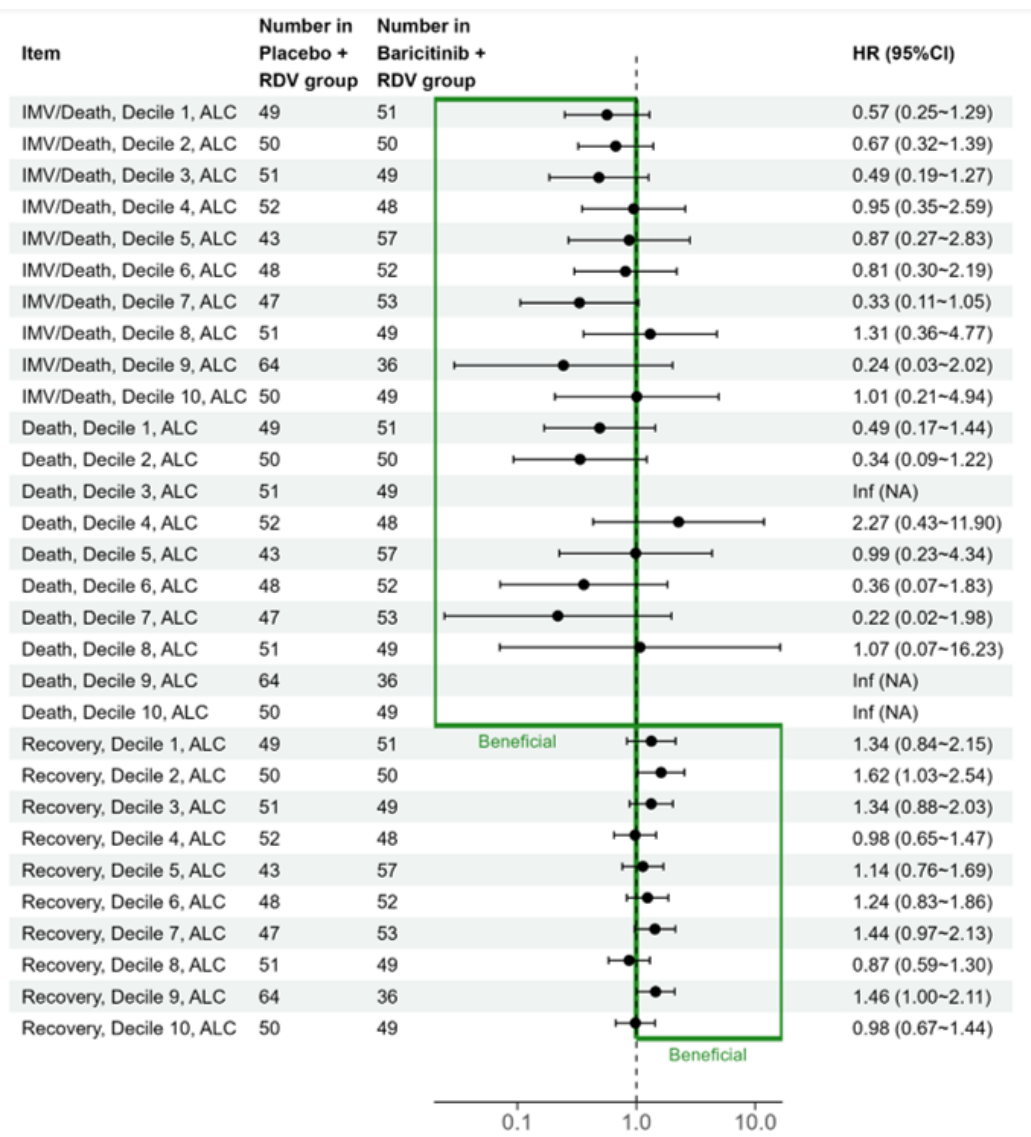

Supplement Figure 10 shows the same analysis by deciles of ALC to identify a more precise threshold for defining a group benefitting most. The treatment effect estimates in the lower three deciles are similar and do not provide evidence of an alternate numeric threshold for ALC.

RDV: remdesivir, CI: confidence interval, IMV: invasive mechanical ventilation

Supplement Table 12: Fractions and percentages of ACTT-2 participants receiving steroids prior to enrollment by ACTT risk profile quartile and treatment arm.

Fraction indicates the number of participants per quartile per treatment arm. Parenthesis value indicates percentage of participants per quartile per treatment arm

| Arms                     | Least risk† | Lower risk | Moderate risk | High risk  | Total       |
|--------------------------|-------------|------------|---------------|------------|-------------|
| <b>Steroid use</b>       |             |            |               |            |             |
| Placebo + remdesivir     | 3/139(2.2)  | 2/133(1.5) | 2/105(1.9)    | 5/128(3.9) | 12/505(2.4) |
| Baricitinib + remdesivir | 3/132(2.3)  | 4/103(3.9) | 1/116(0.9)    | 1/143(0.7) | 9/494(1.8)  |
| <b>Dexamethasone use</b> |             |            |               |            |             |
| Placebo + remdesivir     | 1/139(0.7)  | 0/133(0)   | 2/105(1.9)    | 1/128(0.8) | 4/505(0.8)  |
| Baricitinib + remdesivir | 0/132(0)    | 1/103(1.0) | 1/116(0.9)    | 0/143(0)   | 2/494(0.4)  |

Supplement Table 13: Fractions and percentages of ACTT-1 and ACTT-2 participants receiving steroids at any point during the study period by ACTT risk profile quartile and treatment arm.

| <b>Study</b> | <b>Arms</b>             | <b>Least risk</b> | <b>Lower risk</b> | <b>Moderate risk</b> | <b>High risk</b> | <b>Total</b>  |
|--------------|-------------------------|-------------------|-------------------|----------------------|------------------|---------------|
| ACTT-1       | Placebo                 | 23/121 (19%)      | 22/132 (17%)      | 42/141 (30%)         | 39/124 (31%)     | 126/518 (24%) |
|              | Remdesivir              | 26/121 (21%)      | 26/145 (18%)      | 32/150 (21%)         | 31/117 (26%)     | 115/533 (22%) |
| ACTT-2       | Placebo+ Remdesivir     | 18/139 (13%)      | 31/133 (23%)      | 29/105 (28%)         | 39/128 (30%)     | 117/505(23%)  |
|              | Baricitinib+ Remdesivir | 18/132 (14%)      | 19/103 (18%)      | 27 /116 (23%)        | 39/143 (27%)     | 103/494(21%)  |

Fraction indicates the number of participants per quartile per treatment arm. Parenthesis value indicates percentage of participants per quartile per treatment arm.



Supplement Figure 11: Changes in log<sub>10</sub> viral load (upper panels) or C-reactive protein (CRP) (lower panels) after initiation of treatment with baricitinib+ remdesivir vs. placebo+remdesivir, by ACTT risk quartile.

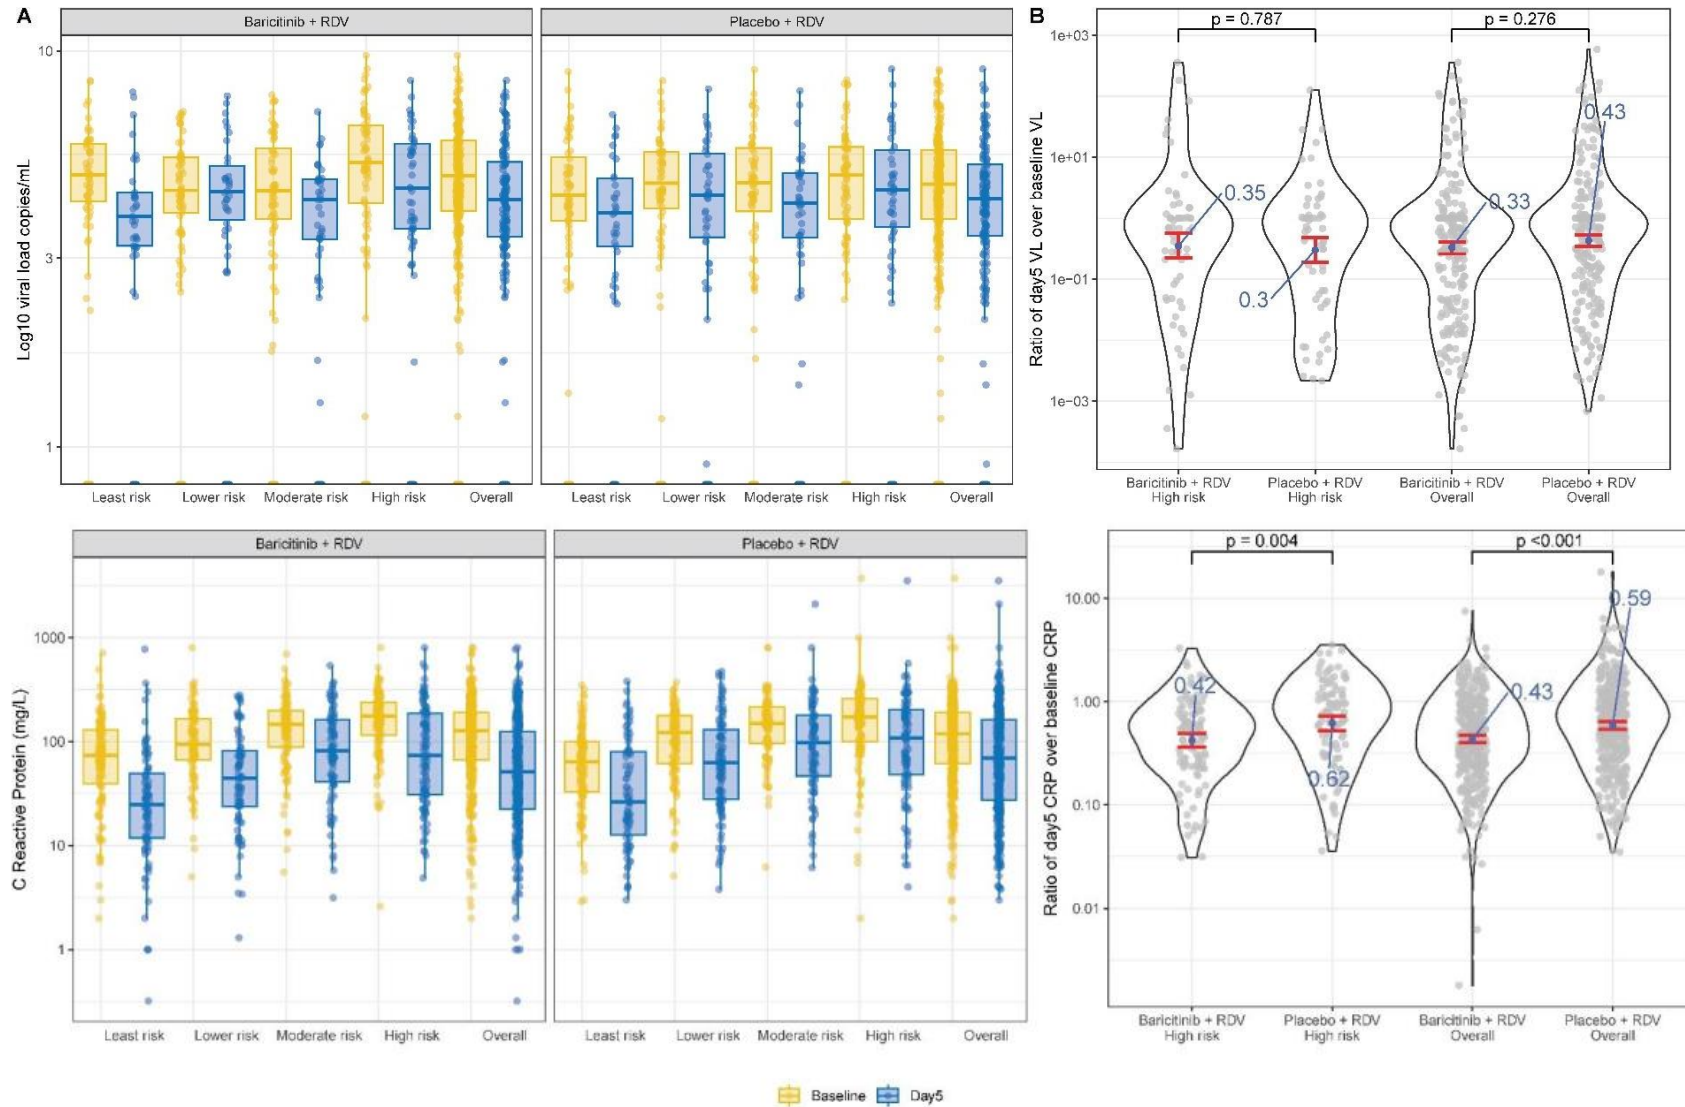

Supplement Figure 11 (continued, from page 33): Changes in  $\log_{10}$  viral load (upper panels) or C-reactive protein (CRP) (lower panels) after initiation of treatment with baricitinib+remdesivir vs. placebo+remdesivir, by ACTT risk quartile. Panel A represents the distribution of  $\log_{10}$ viral load and CRP measurements in individual participants, by quartile, at baseline (yellow) and at day 5 (blue). Panel B presents the distributions of ratio change  $\log_{10}$ viral load and CRP measurements from baseline to Day 5 in the high-risk quartile, and in the study population overall, by treatment arm. The center of the ratio change distribution is quantified by the geometric mean of the ratio change with 95% CI. P-values are from t-tests on the log-transformed ratio changes. Participants with missing Day 5 measurements were excluded from this figure. VL: viral load, RDV: remdesivir

## REFERENCES

- [1] Austin PC, Lee DS, Fine JP. Introduction to the analysis of survival data in the presence of competing risks. *Circulation*. 2016 Feb 9;133(6):601-9.
- [2] Paules CI, Gallagher SK, Rapaka RR, Davey RT, Doernberg SB, Grossberg R, Hynes NA, Ponce PO, Short WR, Voell J, Wang J, Yang OO, Wolfe CR, Lye DC, Dodd LE, Benson CA. Remdesivir for the Prevention of Invasive Mechanical Ventilation or Death in Coronavirus Disease 2019 (COVID-19): A Post Hoc Analysis of the Adaptive COVID-19 Treatment Trial-1 Cohort Data. *Clin Infect Dis*. 2022 Apr 9;74(7):1260-1264.
- [3] Kent DM, Paulus JK, Van Klaveren D, D'Agostino R, Goodman S, Hayward R, Ioannidis JP, Patrick-Lake B, Morton S, Pencina M, Raman G. The predictive approaches to treatment effect heterogeneity (PATH) statement. *Annals of Internal Medicine*. 2020 Jan 7;172(1):35-45.
- [4] Kent DM, Van Klaveren D, Paulus JK, D'Agostino R, Goodman S, Hayward R, Ioannidis JP, Patrick-Lake B, Morton S, Pencina M, Raman G. The predictive approaches to treatment effect heterogeneity (PATH) statement: explanation and elaboration. *Annals of Internal Medicine*. 2020 Jan 7;172(1):W1-25.
- [5] Kalil AC, Patterson TF, Mehta AK, Tomashek KM, Wolfe CR, Ghazaryan V, Marconi VC, Ruiz-Palacios GM, Hsieh L, Kline S, Tapson V. Baricitinib plus remdesivir for hospitalized adults with Covid-19. *New England Journal of Medicine*. 2021 Mar 4;384(9):795-807.
- [6] Covino M, De Matteis G, Burzo ML, Russo A, Forte E, Carnicelli A, et al. Predicting In-Hospital Mortality in COVID-19 Older Patients with Specifically Developed Scores. *Journal of the American Geriatrics Society*. 2021;69(1):37-43.

[7] van Dam PMEL, Zelis N, van Kuijk SMJ, Linkens AEMJH, Brüggemann RAG, Spaetgens B, et al. Performance of prediction models for short-term outcome in COVID-19 patients in the emergency department: a retrospective study. *Annals of Medicine*. 2021;53(1):402-9.

[8] Hosmer DW, Lemeshow S. Goodness of fit tests for the multiple logistic regression model. *Communications in Statistics – Theory and Methods*. 1980; 9(10):1043–1069.
